# Supplementary material for: Estimated Pulse Wave Velocity Is Associated With All‐Cause Mortality During 8.5 Years Follow‐up in Patients Undergoing Elective Coronary Angiography
Source: PubMed Central journal article supplement — J Am Heart Assoc. 2022 May 10;11(10):e025173. doi: 10.1161/JAHA.121.025173 (PMC9238554; doi:10.1161/jaha.121.025173), 2022-05-10

# **SUPPLEMENTAL MATERIAL**

**Table S1. Association between estimated pulse wave velocity (ePWV) and the risk of death, stroke and acute myocardial infarction.**

|                        |                                    | Cuff pulse pressure                                                                  |                                    | Invasive systolic BP                                                                 |                                    | Invasive pulse pressure                                                              |  |
|------------------------|------------------------------------|--------------------------------------------------------------------------------------|------------------------------------|--------------------------------------------------------------------------------------|------------------------------------|--------------------------------------------------------------------------------------|--|
| n=25,066               | Continuous<br>ePWV                 | Dichotomized<br>ePWV                                                                 | Continuous<br>ePWV                 | Dichotomized<br>ePWV                                                                 | Continuous<br>ePWV                 | Dichotomized<br>ePWV                                                                 |  |
|                        | Hazard ratio per 1<br>m/s (95% CI) | Hazard ratio above<br>vs below or equal<br>to the median value<br>10.93 m/s (95% CI) | Hazard ratio per 1<br>m/s (95% CI) | Hazard ratio above<br>vs below or equal<br>to the median value<br>10.93 m/s (95% CI) | Hazard ratio per<br>1 m/s (95% CI) | Hazard ratio above<br>vs below or equal<br>to the median value<br>10.93 m/s (95% CI) |  |
| All-cause<br>mortality |                                    |                                                                                      |                                    |                                                                                      |                                    |                                                                                      |  |
| Crude                  | 1.46 (1.44; 1.49)                  | 3.37 (3.15; 3.61)                                                                    | 1.46 (1.44; 1.49)                  | 3.37 (3.15; 3.61)                                                                    | 1.46 (1.44; 1.49)                  | 3.37 (3.15; 3.61)                                                                    |  |
| Model 1                | 1.02 (0.98; 1.06)                  | 0.997 (0.90;1.10)                                                                    | 1.02 (0.98; 1.05)                  | 0.996 (0.90; 1.10)                                                                   | 1.01 (0.98; 1.04)                  | 0.99 (0.90; 1.09)                                                                    |  |
| Model 2                | 1.04 (1.00; 1.08)                  | 1.01 (0.91;1.11)                                                                     | 1.03 (0.99; 1.07)                  | 0.998 (0.91; 1.10)                                                                   | 1.03 (0.99; 1.06)                  | 1.00 (0.91; 1.10)                                                                    |  |

---

Myocardial  
infarction

|         |                   |                   |                   |                    |                   |                   |
|---------|-------------------|-------------------|-------------------|--------------------|-------------------|-------------------|
| Crude   | 1.17 (1.14; 1.21) | 1.54 (1.38; 1.73) | 1.17 (1.14; 1.21) | 1.54 (1.38; 1.73)  | 1.17 (1.14; 1.21) | 1.54 (1.38; 1.73) |
| Model 1 | 1.10 (1.03; 1.18) | 0.97 (0.82; 1.15) | 1.11 (1.04; 1.18) | 0.998 (0.85; 1.17) | 1.10 (1.04; 1.17) | 1.00 (0.85; 1.18) |
| Model 2 | 1.08 (1.01; 1.16) | 0.95 (0.80; 1.12) | 1.07 (1.00; 1.14) | 0.95 (0.80; 1.11)  | 1.07 (1.00; 1.13) | 0.95 (0.81; 1.12) |

---

Stroke

|         |                    |                   |                   |                   |                   |                   |
|---------|--------------------|-------------------|-------------------|-------------------|-------------------|-------------------|
| Crude   | 1.33 (1.29; 1.39)  | 2.63 (2.26; 3.06) | 1.33 (1.29; 1.39) | 2.63 (2.26; 3.06) | 1.33 (1.29; 1.39) | 2.63 (2.26; 3.06) |
| Model 1 | 1.11 (1.02; 1.21)  | 1.24 (0.999;1.55) | 1.13 (1.04; 1.23) | 1.29 (1.04; 1.59) | 1.15 (1.06; 1.24) | 1.33 (1.07; 1.64) |
| Model 2 | 1.09 (0.999; 1.19) | 1.20 (0.97; 1.51) | 1.10 (1.01; 1.20) | 1.23 (0.99; 1.53) | 1.12 (1.03; 1.21) | 1.27 (1.03; 1.57) |

---

Hazard ratios (HR) per 1 m/s increase in ePWV with 95% confidence intervals (95% CI) and above vs below or equal to the median value 10.93 m/s. Model 1: Adjusted for age and blood pressure. Model 2: Adjusted for age, sex, blood pressure, body mass index, smoking (never, previous vs. current), a categorized Charlson comorbidity index (0, 1, 2 or above 2), estimated glomerular filtration ratio, antihypertensive treatment (yes/no), statin treatment (yes/no), aspirin treatment (yes/no) and number of diseased vessels. (0, diffuse, 1, 2 or 3).

**Figure S1. Flow Diagram.**

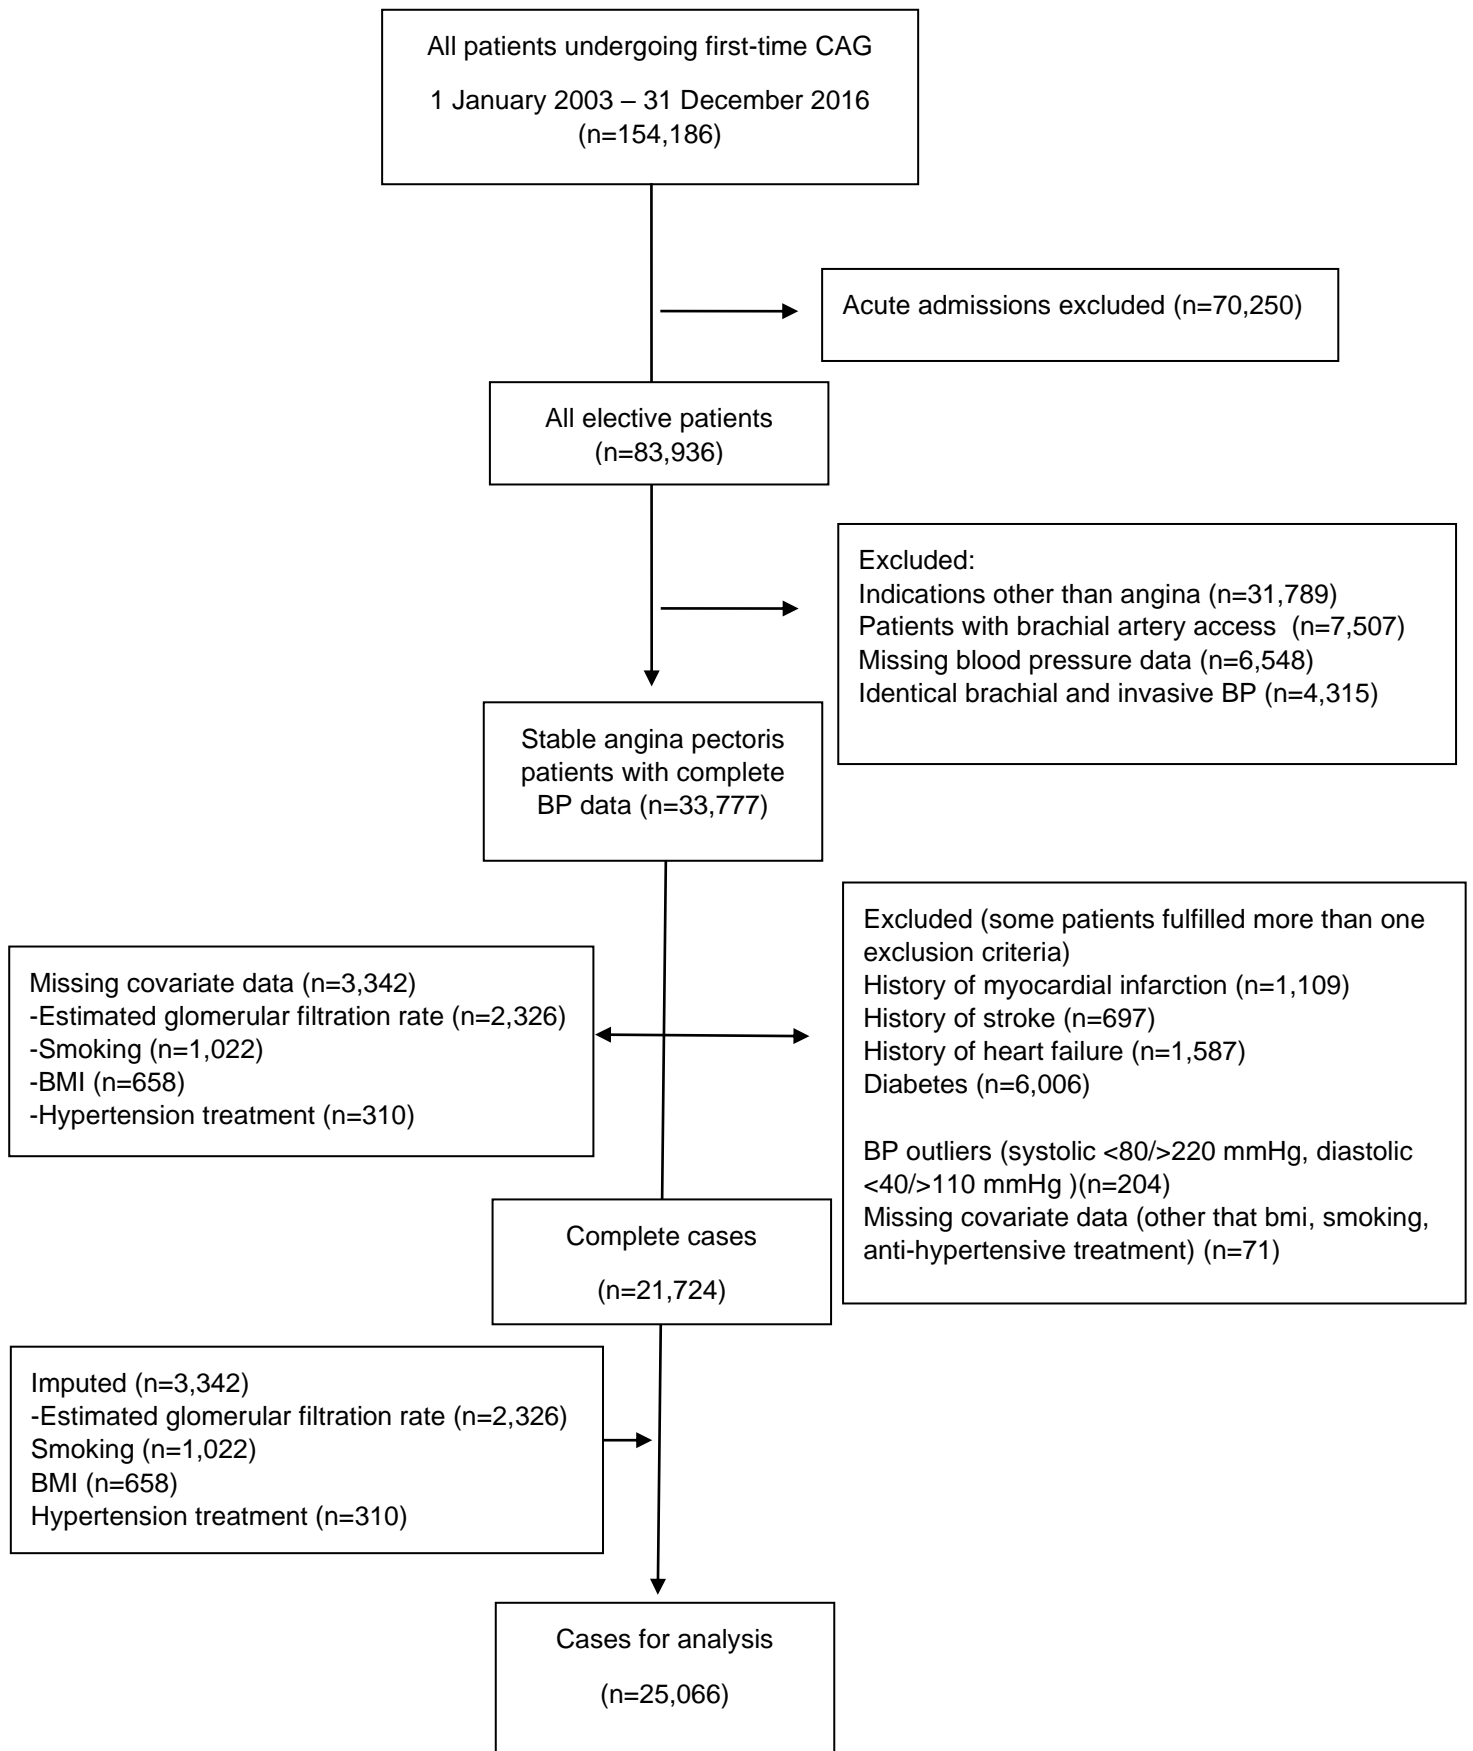

Supplement: JAH3-11-e025173-s001.pdf [file JAH3-11-e025173-s001.pdf]
